# Supplementary material for: Evaluation of circulating plasma proteins in breast cancer using Mendelian randomisation
Source: PubMed Central journal article supplement (PMC10667261; doi:10.1038/s41467-023-43485-8), 2023-11-24
Supplement: 41467_2023_43485_MOESM2_ESM.pdf [file 41467_2023_43485_MOESM2_ESM.pdf]

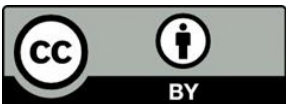

**Open Access** This file is licensed under a Creative Commons Attribution 4.0 International License, which permits use, sharing, adaptation, distribution and reproduction in any medium or format, as long as you give appropriate credit to the original author(s) and the source, provide a link to the Creative Commons license, and indicate if changes were made. In the cases where the authors are anonymous, such as is the case for the reports of anonymous peer reviewers, author attribution should be to 'Anonymous Referee' followed by a clear attribution to the source work. The images or other third party material in this file are included in the article's Creative Commons license, unless indicated otherwise in a credit line to the material. If material is not included in the article's Creative Commons license and your intended use is not permitted by statutory regulation or exceeds the permitted use, you will need to obtain permission directly from the copyright holder. To view a copy of this license, visit <http://creativecommons.org/licenses/by/4.0/>.

## REVIEWER COMMENTS

Reviewer #1 (Remarks to the Author): expertise in computational proteomics

Simply put, the manuscript just isn't terribly compelling. Understandably the goal was laudable and I gather the primary study for blood biomarkers proved negative but for a GWAS study of this kind it is just quite under-powered and it is not at all clear why these markers would be good drug targets. Given that these are SNPs their effect sizes must be modest on risk.

Reviewer #2 (Remarks to the Author): expertise in breast cancer genomics pQTL

Mälarstig et al present a clearly written description of an analysis in which they measure circulating proteins in plasma from women participating in the KARMA study. The method that they use to measure the proteins (Olink PEA Explore) allows them to measure 2,929 pre-defined proteins that have previously been linked to inflammation, cardiometabolic pathways, neurology or oncology. They then look for associations between protein levels and clinical characteristics or genetic variants. They report five proteins as potentially causal role in breast cancer.

### Comments

The authors state that the women were selected for evaluating plasma protein biomarkers in relation to incident breast cancer and refer to a companion paper in which this analysis is described. I think it is a shame that they decided to split the data into two separate papers as I think it would have helped to put the results of this paper into context if the results of the other paper had been available.

I would also have liked some details as to how the blood samples for this study were collected, processed and stored and whether this could impact on the results. For example, for the 716 proteins that they couldn't measure (results line 113) was there any association with the time between blood draw and sample processing?

Similarly, was it always the same samples in which the normalised protein expression levels were below the LOD? If so, was there any difference in the proportion of case samples and control samples that consistently showed normalised protein expression levels below the LOD?

In their analysis of plasma protein levels and clinical characteristics, the authors include both cases and controls as they state that there were no significant differences in protein levels found in the companion paper. This is another instance where not having access to the results in the companion paper makes it difficult to interpret these results. I would expect that a protein, say leptin, that is associated with BMI would be associated with breast cancer risk as BMI is known risk factor for breast cancer. However, there is no difference in BMI between the cases and controls included in this analysis (Table 1). In fact, the BMI in the two groups are so extraordinarily similar I wonder whether the cases and controls been matched on BMI?

Clearly the cases and controls have not been matched on smoking status though. If they have been matched, this should be described and does this matching on some variables (BMI and age, possibly) but not others (smoking) complicate the interpretation of the results?

On a similar point, why are some variables shown in Table 1 (age, BMI, HRT) but not others (alcohol consumption, number of births, menopausal status)?

In their identification of cis-pQTL, the authors cite a threshold for significance of  $<2.2 \times 10^{-4}$  (line 148). In the methods, the threshold they cite is  $<2.77 \times 10^{-4}$  (line 369). This is based on a calculation that there are, on average, 180 independent variants within 1Mb of each protein coding gene that they analyzed (i.e.  $0.05/180$ ). First, which threshold did they use? Second, shouldn't their threshold take account of the fact that they are testing 2,213 hypotheses (ie 2,123 protein measurements) giving a threshold of  $0.05/(180 \times 2213) = 1.25 \times 10^{-7}$ ? Finally they state that they analysed 2,213 proteins for which the NPX was above the LOD in 50% of their samples (line 113). However, in the methods they say that proteins for which  $>75\%$  of samples had NPX that were below the LOD were filtered out, leaving 2,476 for analysis. Again, which threshold for filtering did they use?

Results, line 150. They divide their significant cis-pQTLs into Explore I and Explore II categories. What is the relevance of these categories? Wouldn't it be more informative to divide the results into inflammation, cardiometabolic, neurology and oncology as you would expect that their positive hits would be enriched for oncology, I think.

They identify seven (out of 737) proteins using MR (Table 2). One of these is TXK. However, I can't find TXK in Supplementary Table 1, is this an error?

Colocalization analysis: I found the plots difficult to understand. First there is a trivial error in the numbering. The text says DNPH1 and LRRC37A2 are supplementary Figs 7 and 8 but they are 7 and 9. More importantly, for people who are unfamiliar with these plots, I think the authors need to provide some more explanation either in the methods or the legends. I assumed that the top hits from the protein analysis would always be in red (as in Sup Fig 6 top panel) and that these same variants would

be shown (still in red) but in a different location in the breast cancer analysis (as in Sup Fig 6). In Sup Fig 7, however, the top four dots on the upper panel are orange. Why is this? And why does Sup Fig 9 (LRR37A2) show these horizontal lines for the P values? Is this to do with the LD structure in the region? Or is there something unusual about the distribution of the protein levels?

Discussion: I'm not an expert on MR, but I thought the point was that if you can show a risk between a genetic variant and a measurable intermediate phenotype (eg plasma DNPH1 levels) and between DNPH1 levels and disease risk then you can use the association between the variant and disease to determine whether the association between DNPH1 levels and disease is causal. My concern is that if there is no association between say DNPH1 and breast cancer risk doesn't that undermine the MR concept? More specifically, how can we interpret the statement "Genetically increased circulating protein levels of DNPH1 was in our study associated with increased breast cancer risk" (Discussion line 245) in the light of "This indicates that genetically predicted protein levels did not capture this short-term risk." (Discussion line 234)

Some trivial points:

Discussion, line 224 "We measured 2,949 circulating proteins in plasma". Shouldn't this be 2,929?

T

he order of the Supplementary Tables isn't very helpful. The first one to be cited is Supplementary Table 5 (lines 113 and 115), then Supplementary Table 6 (line 131), then Supplementary Table 1 (line 150) etc.

Reviewer #3 (Remarks to the Author): expertise in Mendelian randomisation

Målarstig et al. present a robust and comprehensive proteomic study of blood plasma from breast cancer patients, utilizing a large sample size (598 women) from the Karolinska Mammography Project. The depth of the study is commendable, analyzing 2,929 unique proteins and identifying potential causal proteins in breast cancer through an ingenious application of Mendelian randomization (MR).

One of the strengths of this study lies in the extensive examination of correlations between protein levels, clinical characteristics, and gene variants. The identification of 812 cis-acting protein quantitative trait loci (pQTL) underscores the rigorous analytical approach employed by the authors and significantly adds to the existing body of knowledge in this field.

The paper effectively uses these pQTLs as instrumental variables in MR analysis, leading to the discovery of five proteins (CD160, DNPH1, LAYN, LRRC37A2, and TLR1) that may play a causal role in breast cancer risk. The authors make a diligent effort to confirm the findings in two independent cohorts (FinnGen R9 and the UK Biobank), strengthening the reliability of the results and providing valuable cross-validation.

Overall, this study represents a significant advancement in our understanding of the blood proteome's relationship to breast cancer. The potential causal proteins identified could be pivotal in the development of future therapeutic strategies.

Although the manuscript is well written, I do have a few comments to be addressed:

1. The paper mentioned several times the “companion paper by Grassmann et al.”, but where is the paper? It is not on the reference list.
2. Although I do believe in the MR-discovered protein targets, I suggest the authors at least try a reverse causality analysis since, for instance, there are more smokers in the cases than in the controls, so the readers (who might not be an expert in human genetics) may question the causal inference.
3. How was the significance threshold for cis-pQTL discoveries determined? It looks like a Bonferroni correction for 812 independent variants (?) If so, were only the 812 variants tested? I would guess all the variants within the 1Mbp window of each coding gene were tested. In this case, the threshold needs to be justified, as the real number of independent tests must be more than 812. Also, in line 149, “independent variants” must correspond to R-squared less than 0.1, not greater than 0.1?
4. In lines 152-154, it is striking to see that some cis-pQTL effects can be “well above 1 SD”. But it looks like these associated variants all have very low MAF. This is thus prone to a winner’s curse. The authors should justify via replications or at least discuss potentially inflated estimates.
5. In the replication analysis, 33 out of 90 CVD-I proteins were reproduced in KARMA. 374 out of 603 proteins were replicated compared to the Somascaan platform. I would like to see further justification for these replication rates, i.e., assuming e.g., the same effect sizes, what kind of proportions out of these proteins shall we expect in the replication samples, given the replication sample size? This will provide us a clue whether the replication rate is reasonable.

6. In the discussion, the 2-year risk results from follow-up data are inconsistent with the MR analysis result (line 231), and the authors attributed it to that genetically predicted protein levels did not capture this short-term risk. Are there any other explanations?

7. Please discuss and explain the reason why none of the previously reported proteins in breast cancer MR studies surpassed statistical significance in this study (line 282).

8. I can't see any legends for Tables 1-3.

9. Please polish Figure 2, e.g. BMI in the figure should be capitalized. It is better to make the figure legend more detailed. It is better to add significance thresholds.

10. The legend of Supplementary Figure 5 is wrongly written as "Supplementary Figure 4A and 4B".

Xia Shen, PhD

Professor in Statistical Genetics

Fudan University

Reviewer #4 (Remarks to the Author): expertise in proteomics

As the latest generation of proteomics platform, the Olink's Proximity Extension Assay (PEA) not only has the high throughput of genomics, but also retains the specificity of protein/antibody recognition. At the same time, it overcomes the limitation of low abundance detection, and overcomes the key factors such as the limitation of detection speed, flux, multiple detection ability and sensitivity of traditional proteomics methods. Especially in the detection of humoral proteome, the use of PEA technology coupled with NGS readout makes it easy to measure the concentration of thousands of human plasma proteins using only a few  $\mu\text{L}$  of blood.

The application of Olink's PEA helps to realize the detection of super-sensitive multiple protein markers, unbiased targeted proteomics and precision proteomics, in order to help the discovery of protein markers, drug development, translational medicine, and make "multi-omics integration" truly feasible.

This paper is another successful application of Olink's PEA. Combined with Mendelian randomisation (MR) analysis, authors found Five proteins with a potential aetiological or causal role in breast cancer, providing a basis for further functional evaluation of their potential as drug targets.

1 **REVIEWER COMMENTS**

2 **Reviewer #1 (Remarks to the Author): expertise in computational proteomics**

3 Simply put, the manuscript just isn't terribly compelling. Understandably the goal was laudable and I gather  
4 the primary study for blood biomarkers proved negative but for a GWAS study of this kind it is just quite  
5 under-powered and it is not at all clear why these markers would be good drug targets. Given that these are  
6 SNPs their effect sizes must be modest on risk.

7 **Response:** We thank the reviewer for providing this perspective and agree that the sample size of the present  
8 study would have been small for a genome-wide association study of a binary disease trait. However, disease  
9 traits are often more complex than circulating protein levels, with the latter showing considerably larger effect  
10 sizes and superior statistical power. Indeed, several previous studies have shown that pQTL can be readily  
11 identified even in moderate samples (PMIDS: 27532455, 25147954). We also agree that common gene  
12 variants, SNPs, for disease traits typically have very small effect sizes, and breast cancer is no exception.

13 Even with these limitations, our work identified over 800 genetic variants with a robust role in regulating  
14 plasma proteins, which increases the understanding of biological pathways in humans.

15 In addition, several studies have shown that pQTL mapping and Mendelian randomization can uncover causal  
16 biology that can be exploited to select drug targets (reviewed here:  
17 <https://pubmed.ncbi.nlm.nih.gov/32860016/>)

18 MR has so far been extensively used to find drug targets in cardiovascular and metabolic disease but less so in  
19 cancer. We hope that the data provided in this manuscript will be used to expand the use of MR in cancer, also  
20 into other female cancers such as ovarian and endometrial cancer. The KARMA data provided here should be a  
21 good basis for such studies, and the summary statistics from the study are shared with the community as part  
22 of this manuscript.

23  
24 **Reviewer #2 (Remarks to the Author): expertise in breast cancer genomics pQTL**

25 Mälärstig et al present a clearly written description of an analysis in which they measure circulating proteins in  
26 plasma from women participating in the KARMA study. The method that they use to measure the proteins  
27 (Olink PEA Explore) allows them to measure 2,929 pre-defined proteins that have previously been linked to  
28 inflammation, cardiometabolic pathways, neurology or oncology. They then look for associations between  
29 protein levels and clinical characteristics or genetic variants. They report five proteins as potentially causal role  
30 in breast cancer.

31 Comments. The authors state that the women were selected for evaluating plasma protein biomarkers in  
32 relation to incident breast cancer and refer to a companion paper in which this analysis is described. I think it is  
33 a shame that they decided to split the data into two separate papers as I think it would have helped to put the  
34 results of this paper into context if the results of the other paper had been available.

35 **Response:** We thank the reviewer for the kind words and the valuable comment. We confirm that this KARMA  
36 sub-study is indeed a nested case/control design, in which samples were selected from women who suffered  
37 incident breast cancer within 2 years, with controls of similar age and geography. The Olink proteomic data of  
38 that sub-study were analysed with the aim to address two separate questions, which included a) do any of the  
39 2,929 proteins play an aetiological role in breast cancer, and b) do any of the circulating proteins provide a  
40 meaningful contribution to early breast cancer detection.

41 For question b) we found that after multiple test corrections, none of the proteins were significantly  
42 associated with the 2-year breast cancer incidence. To make this clearer, we have included a paragraph in  
43 "Results" (lines 113-117) to highlight the lack of robust associations with 2-year breast cancer risk but without  
44 going into detail, which we believe would detract the focus of the present manuscript. We have also edited the  
45 previous section on protein associations with breast cancer in the "Discussion" to emphasize the difference  
46 between life-time risk factors and risk factors associated with short-term risk. We also wanted to highlight that  
47 our study was not powered to detect subtle differences, and relied on a sample taken no more than 2 years  
48 before diagnosis. This text was added "However, similar to some other breast cancer risk factors, plasma levels  
49 of the circulating proteins implicated by the MR analysis did not associate with the 2-year risk of breast cancer



50 at the observational level. We can not exclude that future studies that are larger or that include longitudinal  
 51 pre-diagnostic samples may uncover such associations.”

52 To still allow reviewers and editors to evaluate this lack of association between proteins per se and 2-year  
 53 breast cancer risk, we also include two tables showing 1) top results from the case/control analysis and 2)  
 54 case/control differences for the five proteins with evidence of causality in the Mendelian randomization  
 55 analysis. None of the proteins reached statistical significance. We decided not to use a Bonferroni-corrected p-  
 56 value threshold as it would likely have been too conservative, with a p-value threshold of  $2 \times 10^{-5}$ . Instead, we  
 57 used an optimised FDR approach to calculate q-values from the GLM analysis. With the FDR approach, a q-  
 58 value of less than 0.05 (corresponding to 5% FDR) was considered significant.

59 **Table 1. Top 10 proteins associated with 2-year risk of breast cancer using the nested case/control design**  
 60 **and a general linear model with adjustment for age and body mass index. None of the proteins reached 5 %**  
 61 **FDR corrected significance, as shown by the Q-value.**

| PROTEIN   | PANEL              | PERCENT < LOD | ODDS RATIO (95 % CI) |      |      | P-VALUE  | Q-VALUE |
|-----------|--------------------|---------------|----------------------|------|------|----------|---------|
| NME3      | Inflammation       | 0%            | 0.28                 | 0.44 | 0.69 | 2.16E-04 | 0.25    |
| TACSTD2   | Oncology           | 0%            | 0.32                 | 0.49 | 0.73 | 3.22E-04 | 0.25    |
| NIT1      | Cardiometabolic_II | 0%            | 1.39                 | 2.13 | 3.37 | 3.47E-04 | 0.25    |
| PTPRM     | Inflammation       | 0%            | 0.34                 | 0.50 | 0.74 | 4.10E-04 | 0.25    |
| FSHB      | Cardiometabolic_II | 9%            | 0.19                 | 0.36 | 0.66 | 6.67E-04 | 0.28    |
| SERPINA12 | Cardiometabolic    | 0%            | 1.37                 | 2.21 | 3.79 | 6.90E-04 | 0.28    |
| FGFBP1    | Oncology           | 0%            | 0.35                 | 0.53 | 0.79 | 1.82E-03 | 0.40    |
| PGLYRP2   | Inflammation_II    | 0%            | 0.31                 | 0.51 | 0.79 | 1.93E-03 | 0.40    |
| ROBO2     | Neurology          | 0%            | 0.34                 | 0.53 | 0.80 | 2.03E-03 | 0.40    |
| CDON      | Inflammation       | 0%            | 0.36                 | 0.55 | 0.81 | 2.61E-03 | 0.41    |

63

64 **Table 2. Five proteins with evidence of causality for breast cancer in the Mendelian randomization analysis**  
 65 **using the nested case/control design and a general linear model with adjustment for age and body mass**  
 66 **index. None of the proteins reached 5 % FDR corrected significance.**

67

| PROTEIN  | PANEL           | PERCENT < LOD | ODDS RATIO (95 % CI) |      |      | P-VALUE | Q-VALUE |
|----------|-----------------|---------------|----------------------|------|------|---------|---------|
| CD160    | Inflammation    | 0             | 0.89                 | 0.62 | 1.29 | 0.53    | 0.71    |
| DNP1     | Inflammation    | 0             | 1.34                 | 0.90 | 2.07 | 0.15    | 0.60    |
| LAYN     | Neurology       | 0             | 0.77                 | 0.52 | 1.15 | 0.20    | 0.61    |
| LRRC37A2 | Oncology_II     | 0             | 0.85                 | 0.59 | 1.22 | 0.37    | 0.67    |
| MST1     | Inflammation_II | 0.0067        | 0.53                 | 0.22 | 1.03 | 0.07    | 0.58    |
| TLR1     | Inflammation_II | 0.005         | 0.80                 | 0.54 | 1.16 | 0.24    | 0.63    |
| TXK      | Oncology_II     | 0.7426        | 0.87                 | 0.65 | 1.24 | 0.41    | 0.68    |

68

69 I would also have liked some details as to how the blood samples for this study were collected, processed and  
 70 stored and whether this could impact on the results. For example, for the 716 proteins that they couldn't  
 71 measure (results line 113) was there any association with the time between blood draw and sample  
 72 processing?

73 Response: We thank the reviewer for this important question. To clarify, we now include in the Methods  
 74 section that “Blood samples were collected at baseline. All blood samples were handled in accordance with a  
 75 strict 30-h cold-chain protocol, which required that all blood samples were transported on ice and were  
 76 processed and aliquoted within 30 hours from draw. The sample collection included 16 plasma aliquots, one  
 77 aliquot of extracted DNA and two aliquots of whole blood for back-up. In total, EDTA blood samples from 69  
 78 440 (98% of the total cohort) study participants were collected.

79 However, the exact time between blood draw and handling within the 30-hour cold chain window was not  
80 collected, so we are not able to evaluate the relationship between time-from-blood-draw-to-processing and  
81 proportion above LOD. It is worth noting that previous work has shown that protein levels can, besides the  
82 expected degradation, also *increase* with a prolonged time between draw and freezing, rather than *decrease*.  
83 For example, this work by Shen et al. <https://pubmed.ncbi.nlm.nih.gov/29040064/>.

84 Similarly, was it always the same samples in which the normalised protein expression levels were below the  
85 LOD? If so, was there any difference in the proportion of case samples and control samples that consistently  
86 showed normalised protein expression levels below the LOD?

87 **Response:** There were no differences in the proportion of samples below LOD and cases and controls, even  
88 before quality control. However, data from three samples presented as technical outliers. For the Reviewers  
89 and Editor, the below figure provides additional granularity on QC. One sample was removed entirely  
90 (2000002989), whereas data points were removed for some combinations of proteins and samples. This  
91 procedure is part of the standard quality control and downstream filtering, before analysis of data. It is now  
92 described in detail in the Methods section as well as in Supplementary Methods 1 “A principal component  
93 analysis of all data was performed to detect outliers and to inform potential sample exclusions. Of the 598  
94 samples that were included in the analysis, one sample was excluded entirely, two samples were excluded  
95 from analysis of Explore ONC-II and two samples were excluded from analysis of the Explore INF-II panel data  
96 (Supplementary methods 1).”

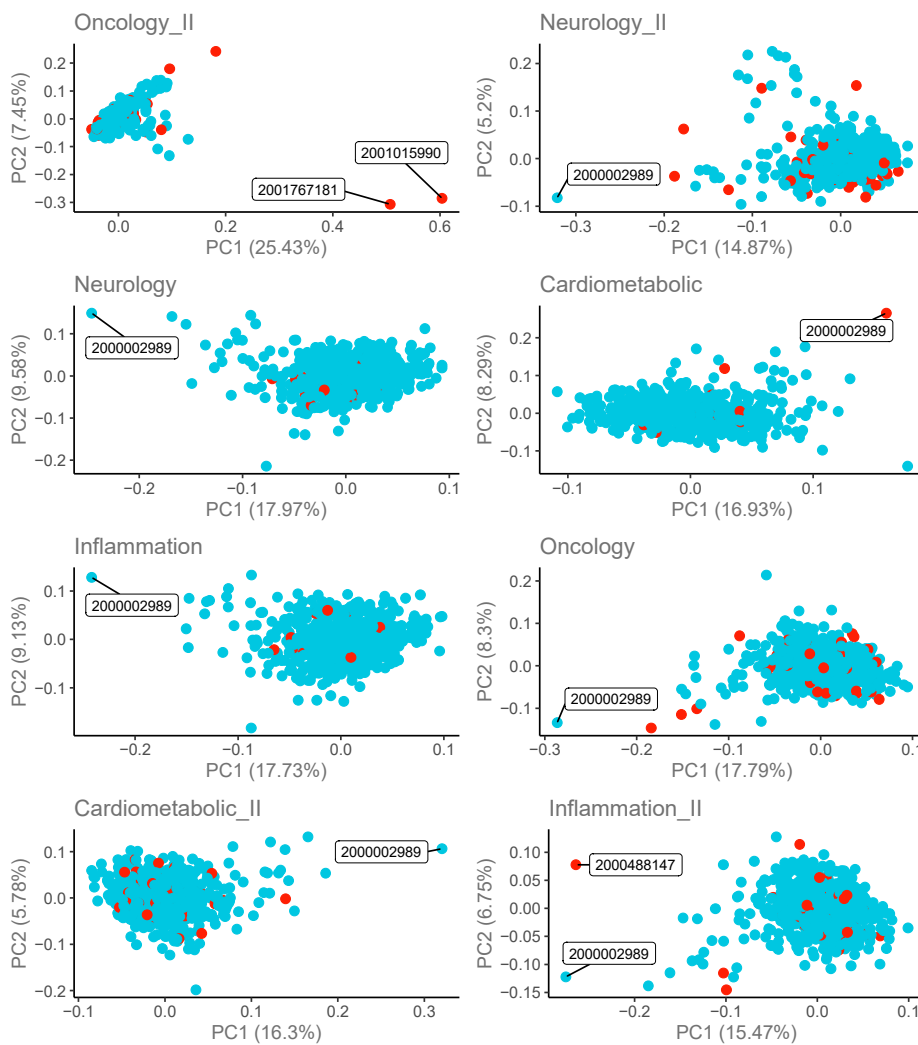

97  
98

99 In their analysis of plasma protein levels and clinical characteristics, the authors include both cases and  
100 controls as they state that there were no significant differences in protein levels found in the companion  
101 paper. This is another instance where not having access to the results in the companion paper makes it  
102 difficult to interpret these results. I would expect that a protein, say leptin, that is associated with BMI would  
103 be associated with breast cancer risk as BMI is known risk factor for breast cancer. However, there is no  
104 difference in BMI between the cases and controls included in this analysis (Table 1). In fact, the BMI in the two  
105 groups are so extraordinarily similar I wonder whether the cases and controls been matched on BMI?

106 Response: We thank the reviewer for this comment. We agree that the rationale for combining incident cases  
107 and controls in the analysis of clinical characteristics can be explained more clearly. We have now added a  
108 section to the Methods section (lines 286-291) of the manuscript stating:

109 *“From KARMA we identified 299 women diagnosed with breast cancer which occurred within two years of*  
110 *blood draw and who were resident in Southern Sweden and collected at the same hospital. We used the*  
111 *matchit function from the MatchIt library implemented in R to match 299 controls from KARMA study to the*  
112 *incident cases by randomly drawing women without incident breast cancer so that the median age at blood*  
113 *draw in cases and controls was similar (median matching)”*

114 The controls were thus not matched for BMI, although the average BMI ended up being very similar between  
115 the groups. While the protein leptin was, as expected, strongly associated with BMI, and BMI in turn with  
116 breast cancer risk, we did not find an association of leptin levels with incident breast cancer ( $p=0.2$ ).

117

118

119 Clearly the cases and controls have not been matched on smoking status though. If they have been matched,  
120 this should be described and does this matching on some variables (BMI and age, possibly) but not others  
121 (smoking) complicate the interpretation of the results?

122 Response: We thank the reviewer for pointing out this detail. The cases and controls were indeed “only”  
123 matched by age, as described in the previous response and as indicate in Table 1 (lines 389-390). The % of  
124 current smokers are clearly different in BC cases and controls. This could in theory confound protein  
125 associations with breast cancer. However, Mendelian Randomization (MR) analysis is robust to such  
126 confounders as we are using genetics to model life-long exposure of different protein levels.

127

128 On a similar point, why are some variables shown in Table 1 (age, BMI, HRT) but not others (alcohol  
129 consumption, number of births, menopausal status)?

130 Response: We thank the reviewer for spotting this error. The missing parameters have now been added to  
131 Table 1 (lines 389-390) “Number of births (S.D) [%]” and “Alcohol (S.D) [gram/week]”.

132 In their identification of cis-pQTL, the authors cite a threshold for significance of  $<2.2 \times 10^{-4}$  (line 148). In the  
133 methods, the threshold they cite is  $<2.77 \times 10^{-4}$  (line 369). This is based on a calculation that there are, on  
134 average, 180 independent variants within 1Mb of each protein coding gene that they analyzed (i.e.  $0.05/180$ ).  
135 First, which threshold did they use? Second, shouldn't their threshold take account of the fact that they are  
136 testing 2,213 hypotheses (ie 2,123 protein measurements) giving a threshold of  $0.05/(180 \times 2213)=1.25 \times 10^{-7}$ ?  
137 Finally they state that they analysed 2,213 proteins for which the NPX was above the LOD in 50% of their  
138 samples (line 113). However, in the methods they say that proteins for which  $>75\%$  of samples had NPX that  
139 were below the LOD were filtered out, leaving 2,476 for analysis. Again, which threshold for filtering did they  
140 use?

141 Response: We thank the reviewer for pointing out this mistake. The threshold was indeed set to account for  
142 180 tests per region based on the average number of independent SNPs in each of the cis-regions, defined as 1  
143 Mbp. The threshold provided in the Methods section was thus correct whereas the one in brackets in the  
144 Results section was wrong. This has now been corrected (see results section lines 139-140).

145 Regarding adjustment for the number of proteins tested, we think this would be overly conservative and lead  
146 to a high false-negative rate; especially considering that there is a strong prior for proteins being regulated in  
147 cis. Previous pQTL studies based on Olink PEA have shown that 80-90 % of the proteins have at least a cis-pQTL  
148 signal at genome-wide significance (e.g Folkersen et al Nat Metab 2020). In addition, a recent preprint based

149 on Olink Explore I in the UK-biobank, state that “82% of proteins tested (1,162 of 1,425 proteins encoded by  
150 genes on autosomes) had a cis association (within 1Mb from the gene encoding the protein)”, “Genetic  
151 regulation of the human plasma proteome in 54,306 UK Biobank participants” Sun et al, BioRxiv 2022,  
152 <https://www.biorxiv.org/content/10.1101/2022.06.17.496443v1.full>.

153 We agree that the previous description was clear when describing the 50 % vs. 75 % above LOD filtering. For  
154 QC, an easily interpretable measure is the number of proteins that can be detected in >50 % of samples, which  
155 is indeed stated in the results section. Based on prior experience, we only excluded proteins with >75 % non-  
156 detectable samples. This is now clarified line 107, and we now state that “*For data analyses, proteins >25 %*  
157 *detectability were included*”.

158 Results, line 150. They divide their significant cis-pQTLs into Explore I and Explore II categories. What is the  
159 relevance of these categories? Wouldn't it be more informative to divide the results into inflammation,  
160 cardiometabolic, neurology and oncology as you would expect that their positive hits would be enriched for  
161 oncology, I think.

162 Response: Thanks for a great comment. While not described in the results section, supplementary table 2  
163 shows the cis-pQTL breakdown both by Explore I and II categories as well as the individual 384-plex panels e.g.  
164 inflammation, neurology etc. The decision to call out the Explore I vs. II difference was primarily motivated by  
165 the fact that the Explore II proteins have not been widely explore for pQTLs, in contrast to Explore I for which a  
166 preprint based on UK-biobank exists (<https://www.biorxiv.org/content/10.1101/2022.06.17.496443v1.full>).

167 While the panels were designed to be enriched for proteins with relevance in e.g. oncology, we often find  
168 these categories to be somewhat less relevant for the biology they may reflect. According to Olink Proteomics,  
169 panels are built on proteins that can be measured using a common sample dilution, meaning that disease-  
170 specificity of any given protein is not the primary consideration ([www.olink.com](http://www.olink.com)). Since the targeted  
171 proteomics approach is not unbiased (proteome-wide), performing pathway enrichment analysis on the  
172 background of the included proteins may be limited in providing insightful details. Many proteins in the assays  
173 either share to be secreted or have been shown to be pleiotropic.

174 They identify seven (out of **737**) proteins using MR (Table 2). One of these is TXK. However, I can't find TXK in  
175 Supplementary Table 1, is this an error?

176 Response: This is well spotted. Indeed, TXK had a detectability level of 74.3 % and had erroneously been  
177 filtered out in an earlier iteration of the supplementary table. The correct version of supplementary table 1  
178 (renumbered to ST4) is now provided.

179 Colocalization analysis: I found the plots difficult to understand. First there is a trivial error in the numbering.  
180 The text says DNPH1 and LRR37A2 are supplementary Figs 7 and 8 but they are 7 and 9. More importantly,  
181 for people who are unfamiliar with these plots, I think the authors need to provide some more explanation  
182 either in the methods or the legends. I assumed that the top hits from the protein analysis would always be in  
183 red (as in Sup Fig 6 top panel) and that these same variants would be shown (still in red) but in a different  
184 location in the breast cancer analysis (as in Sup Fig 6). In Sup Fig 7, however, the top four dots on the upper  
185 panel are orange. Why is this? And why does Sup Fig 9 (LRR37A2) show these horizontal lines for the P  
186 values? Is this to do with the LD structure in the region? Or is there something unusual about the distribution  
187 of the protein levels?

188

189 Response: We thank the reviewer for the helpful comments. The numbering has now been corrected (line  
190 192). We agree that the figure needs more explanation and have added the following to the figure legends:  
191 “*The LD information shown is based on LD calculations for the lead pQTL identified in the KARMA cohort, with*  
192 *individual variants shown in supplementary table 1, with the same variants highlighted for breast cancer risk in*  
193 *the BCAC data.*”

194 The reviewer's interpretation of the Mirror plots is also correct. For DNPH1, the top variant, rs75591122 has a  
195 p-value of  $1.13 \times 10^{-10}$  but was shown in orange. The reason is that another significant variant was chosen for  
196 the LD reference, and was a mistake made at the stage of plotting the data.

197

198 Discussion: I'm not an expert on MR, but I thought the point was that if you can show a risk between a genetic  
199 variant and a measurable intermediate phenotype (eg plasma DNPH1 levels) and between DNPH1 levels and

200 disease risk then you can use the association between the variant and disease to determine whether the  
201 association between DNPH1 levels and disease is causal. My concern is that if there is no association between  
202 say DNPH1 and breast cancer risk doesn't that undermine the MR concept? More specifically, how can we  
203 interpret the statement "Genetically increased circulating protein levels of DNPH1 was in our study associated  
204 with increased breast cancer risk" (Discussion line 245) in the light of "This indicates that genetically predicted  
205 protein levels did not capture this short-term risk." (Discussion line 234)

206 *Response: We agree with the reviewer that association between a risk factor and disease is a good starting*  
207 *point for MR, mainly because it allows targeted testing of a factor for which you have a prior belief there is a*  
208 *correlative or causal relationship. And this limits the test space. However, MR does not assume, or depend on,*  
209 *known observational relationships between the factor and the disease. In fact, we tested observational*  
210 *relationships between the 2-year risk breast cancer incidence for each of the proteins, and no associations*  
211 *were observed. We now include this information, please see below (and lines 114-117). However, exposure to*  
212 *higher levels of e.g. the contribution of genetics on DNPH1 levels may be too small to be detected in our*  
213 *~300+300 cases and controls, or the time between sampling and breast cancer risk may have been too short to*  
214 *detect the observational relationship. MR is a robust way to model exposure to higher protein levels over the*  
215 *course of life, and we provide near-independent replication data.*

216 *We have now added a section under results (lines 114-117) stating that "To evaluate the association of*  
217 *proteins with breast cancer risk, a regression model adjusting for age at blood draw, body mass index and*  
218 *sample storage time was fitted for each of the 2,929 proteins. A false-discovery rate <0.05 was used to*  
219 *determine statistical significance. None of the proteins surpassed the threshold for statistical significance (data*  
220 *not shown)."*

221 Some trivial points:

222 Discussion, line 224 "We measured 2,949 circulating proteins in plasma". Shouldn't this be 2,929?

223 *Response: We have updated the number to state 2,929 proteins (line 203). The number 2,949 is for all the*  
224 *assays performed. This includes 20 proteins that were analyzed on two different panels.*

225 The order of the Supplementary Tables isn't very helpful. The first one to be cited is Supplementary Table 5  
226 (lines 113 and 115), then Supplementary Table 6 (line 131), then Supplementary Table 1 (line 150) etc.

227 *Response: We have updated the number of the supplementary tables according to the main text.*

### 228 **Reviewer #3 (Remarks to the Author): expertise in Mendelian randomisation**

229 Mälarstig et al. present a robust and comprehensive proteomic study of blood plasma from breast cancer  
230 patients, utilizing a large sample size (598 women) from the Karolinska Mammography Project. The depth of  
231 the study is commendable, analyzing 2,929 unique proteins and identifying potential causal proteins in breast  
232 cancer through an ingenious application of Mendelian randomization (MR).

233 One of the strengths of this study lies in the extensive examination of correlations between protein levels,  
234 clinical characteristics, and gene variants. The identification of 812 cis-acting protein quantitative trait loci  
235 (pQTL) underscores the rigorous analytical approach employed by the authors and significantly adds to the  
236 existing body of knowledge in this field.

237 The paper effectively uses these pQTLs as instrumental variables in MR analysis, leading to the discovery of  
238 five proteins (CD160, DNPH1, LAYN, LRR37A2, and TLR1) that may play a causal role in breast cancer risk. The  
239 authors make a diligent effort to confirm the findings in two independent cohorts (FinnGen R9 and the UK  
240 Biobank), strengthening the reliability of the results and providing valuable cross-validation.

241 Overall, this study represents a significant advancement in our understanding of the blood proteome's  
242 relationship to breast cancer. The potential causal proteins identified could be pivotal in the development of  
243 future therapeutic strategies.

244 *Response: We thank the reviewer for this great summary and kind words on the work.*

245 Although the manuscript is well written, I do have a few comments to be addressed:

246 1. The paper mentioned several times the "companion paper by Grassmann et al.", but where is the paper? It  
247 is not on the reference list.

248 Response: The Mälärstig et al. manuscript was initially submitted to Nature Communications at the same time  
249 as our Grassmann et al manuscript. The latter reports on the lack of association between Olink proteins and  
250 incident breast cancer in the KARMA cohort. The Grassmann et al. manuscript under review in different  
251 journal, hence we have removed the references. To add some clarity around the observational proteomics on  
252 breast cancer, we have now added a section in the “Results” (lines 113-117) stating the lack of significant  
253 findings for 2-year risk of breast cancer.

254 2. Although I do believe in the MR-discovered protein targets, I suggest the authors at least try a reverse  
255 causality analysis since, for instance, there are more smokers in the cases than in the controls, so the readers  
256 (who might not be an expert in human genetics) may question the causal inference.

257 Response: We agree with the reviewer, and considering the small sample size, we decided to focus this  
258 manuscript on discovery cis-pQTL, defined as within 1 Mb from the protein coding gene. While we agree that it  
259 may yield some further insights, we currently do not have the data to run bi-directional MRs based on  
260 smoking.

261 However, and for the Reviewers and Editor, we investigated the effect of smoking per se on all proteins,  
262 including the 5 that we found causal evidence for in breast cancer. None of the 5 proteins showed an  
263 association with smoking status.

264

| ASSAY    | ESTIMATE | STD.ERROR | STATISTIC | P.VALUE | P.VALUE_ADJUSTED |
|----------|----------|-----------|-----------|---------|------------------|
| CD160    | -0.0009  | 0.0718    | -0.0129   | 0.9896  | 0.9992           |
| DNP1     | 0.1431   | 0.0759    | 1.8859    | 0.0598  | 0.3314           |
| LAYN     | 0.0661   | 0.0472    | 1.3999    | 0.1621  | 0.5548           |
| LRRC37A2 | -0.0191  | 0.0752    | -0.2536   | 0.7998  | 0.9549           |
| TLR1     | -0.0268  | 0.0473    | -0.5660   | 0.5716  | 0.8739           |

265

266 3. How was the significance threshold for cis-pQTL discoveries determined? It looks like a Bonferroni  
267 correction for 812 independent variants (?) If so, were only the 812 variants tested? I would guess all the  
268 variants within the 1Mbp window of each coding gene were tested. In this case, the threshold needs to be  
269 justified, as the real number of independent tests must be more than 812. Also, in line 149, “independent  
270 variants” must correspond to R-squared less than 0.1, not greater than 0.1?

271 Response: We thank the reviewer for this valid observation. Given the focus of the discovery on cis-pQTL, we  
272 pulled out all variants within the 1 MBp regions of all genes coding for the proteins measured on the Olink 3k.  
273 We then calculated the average number of independent variants ( $R^2 < 0.1$ ) across the regions. This number  
274 was ~180. The per locus p-value threshold was then  $0.05/180$  i.e.  $2.77 \times 10^{-4}$ , which was then used for the  
275 discovery analysis (line 139 in revised manuscript). The number 812 refers to the total number of significant  
276 independent associations across the 737 proteins showing signal.

277 Thank you for pointing out the error on line 149. It has now been corrected, see line 140 in the revised  
278 manuscript.

279 4. In lines 152-154, it is striking to see that some cis-pQTL effects can be “well above 1 SD”. But it looks like  
280 these associated variants all have very low MAF. This is thus prone to a winner’s curse. The authors should  
281 justify via replications or at least discuss potentially inflated estimates.

282 Response: We agree with the reviewer and have added to the discussion (lines 269-271 in the revised  
283 manuscript): “In addition, several of the cis-pQTL with very large effect sizes such as *ENTPD6* and *NT5C* have a  
284 minor allele frequency of less than 3 % and their effect sizes may well be inflated because of the so called  
285 “winner’s curse.”

286 5. In the replication analysis, 33 out of 90 CVD-I proteins were reproduced in KARMA. 374 out of 603 proteins  
287 were replicated compared to the Somascan platform. I would like to see further justification for these  
288 replication rates, i.e., assuming e.g., the same effect sizes, what kind of proportions out of these proteins shall  
289 we expect in the replication samples, given the replication sample size? This will provide us a clue whether the  
290 replication rate is reasonable.



291 Response: We thank the reviewer for these suggestions. The sample sizes for the replication datasets were  
292 several times larger than the KARMA study, and included both women and men. Considering the difference in  
293 samples size, it is reasonable to assume that any pQTL detected in KARMA should also be detectable in the  
294 replication studies, unless there is a strong interaction effect with gender. Rather than focusing on p-values for  
295 the comparison with the Olink pQTL from SCALLOP CVD-I, we wanted to show the consistency of effect sizes  
296 across KARMA and the SCALLOP data. We have now added (lines 152-153 in revised manuscript) that “*The*  
297 *beta estimates were strongly consistent across all overlapping proteins.*” In addition to stating that 33 out of 90  
298 proteins had a p<0.05. The consistency of the effect size is probably more interesting here, considering the  
299 large difference in sample size ~600 vs. ~22,000. We also added to the Discussion a line to point out that the  
300 pQTL data we compared with were derived “in a study several times larger than the present one” (Lines  
301 272/273)

302 Regarding the Somascan comparison, there are significant differences between the Olink and the Somascan  
303 assay with regards to detection principles (antibodies vs. aptamers). Nevertheless, we thought it would be  
304 interesting for the reader to see how the novel KARMA cis-pQTL compare with the Somascan-based pQTL.  
305 Again, the smallest study used for the Somascan replication was several times larger (nearly 30,000 for  
306 Ferkingstad and 10,000 for Pietzner et al). The details on overlapping assays and proteins/pQTL that replicated  
307 are shown in columns 25 (with column name: “*Replicating*”) and 26 (with column name:  
308 “*SomascanV4\_Assay\_available*”) in supplementary table 4 (in the current version). The latter column will tell  
309 whether there was indeed an overlapping assay, which becomes the denominator for checking the replication  
310 rate.

311 6. In the discussion, the 2-year risk results from follow-up data are inconsistent with the MR analysis result  
312 (line 231), and the authors attributed it to that genetically predicted protein levels did not capture this short-  
313 term risk. Are there any other explanations?

314 Response: We thank for reviewer for bringing up this question. We believe that the main reason the  
315 observational analysis did not recapitulate the MR findings is the relatively subtle genetic influence on protein  
316 levels. This is mainly meaningful over the course of life, such as what we model with MR. With sensitive  
317 methods and samples collected at multiple time points prior to the breast cancer diagnoses, such changes may  
318 be observed also at the proteomic level but the nested case/control design we used here was likely  
319 insufficient. The statistical power to detect observational changes may also have been limited, given a sample  
320 size of 299 incident BC cases and the same number of controls.

321 7. Please discuss and explain the reason why none of the previously reported proteins in breast cancer MR  
322 studies surpassed statistical significance in this study (line 282).

323 Response: We thank the reviewer for this suggestion and have now elaborated on the replication data of  
324 previous MR findings in the Discussion. The edited text is as follows: “Of the 28 proteins previously reported in  
325 breast cancer MR studies, our study included post-QC data on 22 proteins and a cis-pQTL was identified in our  
326 study for five of them (RELT, ENG, TFPI, ISLR2, SCG3). We replicated cis-pQTL reported for RELT, ENG and SCG3  
327 in reference 26, which were based on the Somascan protein assay, but were unable to replicate pQTL reported  
328 for TFPI, ISLR2 (Supplementary table 4). None of the five proteins surpassed statistical significance for breast  
329 cancer risk in our MR study, although SCG3 and TFPI showed nominal significance at the discovery stage  
330 (Supplementary table 5). Lack of replication for RELT and ENG may be explained by differences in instrumental  
331 variable selection and statistical thresholds used.”

332 8. I can't see any legends for Tables 1-3.

333 Response: We have now added titles for Tables 1-3, please see updated manuscript version (lines 389-394).

334 9. Please polish Figure 2, e.g. BMI in the figure should be capitalized. It is better to make the figure legend  
335 more detailed. It is better to add significance thresholds.

336 Response: We agree with the reviewer and have updated figure 2, including lines for significance to help the  
337 reader and fixed the headlines for reach plot.

338 10. The legend of Supplementary Figure 5 is wrongly written as “Supplementary Figure 4A and 4B”.

339 Response: Thank you for spotting this error. We have corrected the legend.

340 **Reviewer #4 (Remarks to the Author): expertise in proteomics**

341 As the latest generation of proteomics platform, the Olink's Proximity Extension Assay (PEA) not only has the  
342 high throughput of genomics, but also retains the specificity of protein/antibody recognition. At the same  
343 time, it overcomes the limitation of low abundance detection, and overcomes the key factors such as the  
344 limitation of detection speed, flux, multiple detection ability and sensitivity of traditional proteomics methods.  
345 Especially in the detection of humoral proteome, the use of PEA technology coupled with NGS readout makes  
346 it easy to measure the concentration of thousands of human plasma proteins using only a few  $\mu\text{L}$  of blood.

347 The application of Olink's PEA helps to realize the detection of super-sensitive multiple protein markers,  
348 unbiased targeted proteomics and precision proteomics, in order to help the discovery of protein markers,  
349 drug development, translational medicine, and make "multi-omics integration" truly feasible.

350 This paper is another successful application of Olink's PEA. Combined with Mendelian randomisation (MR)  
351 analysis, authors found Five proteins with a potential aetiological or causal role in breast cancer, providing a  
352 basis for further functional evaluation of their potential as drug targets.

353 [Response: We are thankful for the very positive and supportive comments. We agree that the specificity of the](#)  
354 [protein assay provides high-confidence cis-pQTL, which in turn support interpretation of the MR results.](#)



## REVIEWERS' COMMENTS

Reviewer #2 (Remarks to the Author):

I have no further comments

Reviewer #3 (Remarks to the Author):

The authors have conducted a satisfactory revision. I have no further major concerns.
