# Supplementary material for: Evaluation of circulating plasma proteins in breast cancer using Mendelian randomisation
Source: PubMed Central journal article supplement (PMC10667261; doi:10.1038/s41467-023-43485-8), 2023-11-24
Supplement: 41467_2023_43485_MOESM3_ESM.pdf [file 41467_2023_43485_MOESM3_ESM.pdf]

## **Description of Additional Supplementary Files**

**Supplementary Data 1-** Proteins measured in KARMA on the Olink Explore I and II panels and % detected above limit of detection

**Supplementary Data 2-** Comparisons with human protein atlas blood data for proteins also measured in the present study

**Supplementary Data 3-** Association between Olink proteins and clinical characteristics of the KARMA women

**Supplementary Data 4-** cis-pQTL identified in the KARMA study.

**Supplementary Data 5-** Mendelian randomization results for breast cancer, using BCAC as outcome data

**Supplementary Data 6-** Mendelian randomization results for breast cancer risk factors
